# Supplementary material
Source: PubMed Central journal article supplement (PMC6656607)
Supplement: NIHMS1528162-supplement-1.pdf [file NIHMS1528162-supplement-1.pdf]

**Table S1. Comparison of baseline characteristics and changes in weight, vo2max and HOMA1R (N = 180) between Ancillary and non-Ancillary participants.**

|                                                  | <b>Ancillary (n = 88)</b> | <b>NON-Ancillary (n = 92)</b> | <b>p-value</b> |
|--------------------------------------------------|---------------------------|-------------------------------|----------------|
|                                                  | <b>Mean(SD)</b>           | <b>Mean(SD)</b>               |                |
| <b>Age (years)</b>                               | 69.0( 3.5)                | 69.4( 3.6)                    | 0.47           |
| <b>Female, N (%)</b>                             | 68 (77.3)                 | 68 (73.9)                     | 0.60           |
| <b>White, N (%)</b>                              | 56 (63.6)                 | 75 (81.5)                     | 0.0070         |
| <b>Education, N (%)</b>                          |                           |                               |                |
| <b>&lt; High School</b>                          | 21 (23.9)                 | 16 (17.4)                     | 0.56           |
| <b>High School</b>                               | 46 (52.3)                 | 52 (56.5)                     |                |
| <b>&gt; High School</b>                          | 21 (23.9)                 | 24 (26.1)                     |                |
| <b>Weight (kg)</b>                               | 95.3( 13.7)               | 92.8( 12.9)                   | 0.20           |
| <b>BMI (kg/m<sup>2</sup>)</b>                    | 35.3( 3.9)                | 33.8( 2.9)                    | 0.0041         |
| <b>Percent Body Fat (%)</b>                      | 44.9( 5.8)                | 43.3( 6.3)                    | 0.07           |
| <b>Resting Seated Blood Pressure</b>             |                           |                               |                |
| <b>SBP (mmHg)</b>                                | 134.0( 16.4)              | 137.5( 17.9)                  | 0.17           |
| <b>DBP (mmHg)</b>                                | 73.6( 10.2)               | 75.6( 10.2)                   | 0.19           |
| <b>HDL cholesterol (mg/dl)</b>                   | 59.3( 15.7)               | 54.6( 16.7)                   | 0.0514         |
| <b>LDL cholesterol (mg/dl)</b>                   | 110.1( 36.0)              | 113.1( 31.2)                  | 0.13           |
| <b>Triglycerides (mg/dl)</b>                     | 120.2( 58.6)              | 133.5( 57.5)                  | 0.94           |
| <b>Fasting Glucose (mg/dl)</b>                   | 102.7( 15.3)              | 102.9( 21.6)                  | 0.39           |
| <b>HOMA2-IR</b>                                  | 2.1( 1.1)                 | 2.0( 1.2)                     | 0.51           |
| <b>Self-reported co-morbidities, N (%)</b>       |                           |                               |                |
| <b>Hypertension</b>                              | 57 (64.8)                 | 51(55.4)                      | 0.20           |
| <b>Non-insulin treated diabetes</b>              | 14 (15.9)                 | 16 (17.4)                     | 0.79           |
| <b>Medication Use, N (%)</b>                     |                           |                               |                |
| <b>Antihypertensive</b>                          |                           |                               |                |
| <b>Antidiabetic</b>                              |                           |                               |                |
| <b>Cholesterol-lowering</b>                      |                           |                               |                |
| <b>Antidepressant/Mood</b>                       |                           |                               |                |
| <b>Peak VO<sub>2</sub> (ml/kg/min)</b>           | 17.6( 3.6)                | 18.4( 3.0)                    | 0.11           |
| <b>Change of Body Weight (kg)</b>                | -7.5( 5.8)                | -5.8( 4.4)                    | 0.0516         |
| <b>Change of HOMA2_IR</b>                        | -0.6( 1.1)                | -0.5( 1.0)                    | 0.29           |
| <b>Change of Peak VO<sub>2</sub> (ml/kg/min)</b> | 2.7( 3.8)                 | 2.0( 2.1)                     | 0.16           |

**Table S2. Change from baseline at Post-Intervention and Long-Term Follow-up across all 3 groups.** Adjusted for age, sex, race, education, hypertension status, diabetes status, and BMI.

| <b>Outcomes</b>            | <b>Post-Intervention<br/>Adjusted Mean Change<br/>Score (95% CI)</b> | <b>p-value</b> | <b>Long-Term<br/>Adjusted Mean Change<br/>Score (95% CI)</b> | <b>p-value</b> | <b>Visit<br/>p-value</b> |
|----------------------------|----------------------------------------------------------------------|----------------|--------------------------------------------------------------|----------------|--------------------------|
| <b>EF</b>                  | 0.114 (0.028,0.200)                                                  | 0.01017        | 0.074 (-.014,0.162)                                          | 0.09874        | 0.1824                   |
| <b>DSST</b>                | 1.099 (-.447,2.645)                                                  | 0.16033        | 3.300 (1.725,4.874)                                          | 0.00009        | 0.0008                   |
| <b>Trails A-B</b>          | -1.64 (-8.86,5.590)                                                  | 0.65239        | 2.585 (-4.92,10.09)                                          | 0.49351        | 0.2945                   |
| <b>Stroop Interference</b> | -2.62 (-5.23,-.006)                                                  | 0.04948        | -1.00 (-3.73,1.720)                                          | 0.46375        | 0.2084                   |
| <b>Semantic Fluency</b>    | 0.327 (-.584,1.237)                                                  | 0.47579        | -0.815 (-1.76,0.131)                                         | 0.08993        | 0.0165                   |
| <b>Phonemic Fluency</b>    | 0.662 (-.057,1.381)                                                  | 0.07057        | 0.768 (0.034,1.502)                                          | 0.04062        | 0.6521                   |
| <b>RAVLT</b>               | 1.905 (-.319,4.129)                                                  | 0.09183        | 4.148 (1.871,6.425)                                          | 0.00056        | 0.0094                   |
| <b>MMSE</b>                | 0.479 (0.083,0.876)                                                  | 0.01857        | 0.869 (0.455,1.284)                                          | 0.00009        | 0.8560                   |

**Table S3. Adjusted mean change scores (95% CI) show effects of randomization on cognitive outcomes at post-intervention and long-term follow-up based on mixed-effect models.**

| Outcomes            | Post-intervention  |                    |                    | Long-term Follow-up |                    |                    | p-value | p-value |
|---------------------|--------------------|--------------------|--------------------|---------------------|--------------------|--------------------|---------|---------|
|                     | ExOnly             | Ex+Mod-CR          | Ex+High-CR         | ExOnly              | Ex+Mod-CR          | Ex+High-CR         | visit   | group   |
| Model I             |                    |                    |                    |                     |                    |                    |         |         |
| EF Composite        | 0.130(0.003,0.257) | 0.108(-.004,0.220) | 0.121(0.003,0.239) | 0.089(-.038,0.216)  | 0.068(-.048,0.183) | 0.081(-.039,0.200) | 0.1808  | 0.9557  |
| DSC                 | 1.620(-.682,3.923) | 1.075(-.882,3.033) | 1.171(-.920,3.262) | 3.817(1.531,6.104)  | 3.272(1.258,5.286) | 3.368(1.240,5.495) | 0.0008  | 0.9060  |
| Trials B-A          | -.835(-11.4,9.758) | 1.521(-7.72,10.76) | -5.45(-15.2,4.301) | 3.491(-6.99,13.98)  | 5.846(-3.84,15.53) | -1.12(-11.2,8.963) | 0.2822  | 0.4540  |
| Stroop Interference | -3.95(-7.71,-.188) | -.618(-3.90,2.660) | -2.77(-6.20,0.667) | -2.36(-6.10,1.392)  | 0.973(-2.47,4.416) | -1.18(-4.73,2.377) | 0.2151  | 0.2740  |
| Semantic Fluency    | 0.025(-1.29,1.344) | 0.609(-.555,1.773) | 0.493(-.722,1.708) | -1.12(-2.43,0.191)  | -.535(-1.75,0.679) | -.651(-1.91,0.604) | 0.0160  | 0.7120  |
| Phonemic Fluency    | 1.175(0.103,2.247) | 0.690(-.241,1.622) | 0.181(-.797,1.159) | 1.278(0.210,2.346)  | 0.794(-.159,1.746) | 0.284(-.712,1.279) | 0.6626  | 0.2826  |
| RAVLT               | 3.382(0.145,6.620) | 0.607(-2.24,3.459) | 2.033(-1.03,5.092) | 5.610(2.386,8.834)  | 2.835(-.091,5.761) | 4.261(1.143,7.380) | 0.0101  | 0.3340  |
| MMSE                | 0.126(-.438,0.691) | 0.408(-.102,0.918) | 0.865(0.334,1.397) | 0.506(-.055,1.066)  | 0.788(0.252,1.323) | 1.245(0.692,1.798) | 0.0966  | 0.0603  |
| Model II            |                    |                    |                    |                     |                    |                    |         |         |
| EF Composite        | 0.126(-.003,0.255) | 0.100(-.015,0.216) | 0.114(-.005,0.234) | 0.086(-.043,0.214)  | 0.060(-.058,0.179) | 0.074(-.047,0.195) | 0.1825  | 0.9430  |
| DSC                 | 1.435(-.866,3.735) | 0.877(-1.12,2.875) | 0.985(-1.11,3.075) | 3.635(1.352,5.919)  | 3.078(1.032,5.123) | 3.186(1.058,5.313) | 0.0008  | 0.9028  |
| Trials B-A          | -1.38(-11.8,9.074) | 2.135(-7.11,11.38) | -5.66(-15.3,3.964) | 2.842(-7.50,13.19)  | 6.357(-3.30,16.01) | -1.44(-11.4,8.529) | 0.2945  | 0.3834  |
| Stroop Interference | -4.10(-7.93,-.266) | -.885(-4.28,2.513) | -2.82(-6.33,0.684) | -2.49(-6.31,1.335)  | 0.728(-2.82,4.276) | -1.21(-4.83,2.419) | 0.2085  | 0.3278  |
| Semantic Fluency    | -.033(-1.36,1.297) | 0.525(-.665,1.716) | 0.487(-.739,1.714) | -1.17(-2.50,0.147)  | -.616(-1.85,0.622) | -.654(-1.92,0.614) | 0.0166  | 0.7124  |
| Phonemic Fluency    | 1.180(0.086,2.274) | 0.632(-.332,1.597) | 0.173(-.828,1.175) | 1.286(0.196,2.376)  | 0.739(-.245,1.722) | 0.279(-.740,1.299) | 0.6521  | 0.2915  |
| RAVLT               | 3.349(0.089,6.610) | 0.164(-2.76,3.084) | 2.202(-.902,5.305) | 5.592(2.344,8.841)  | 2.407(-.584,5.397) | 4.445(1.280,7.609) | 0.0095  | 0.2345  |
| MMSE                | 0.165(-.389,0.718) | 0.354(-.152,0.859) | 0.920(0.396,1.443) | 0.555(0.005,1.104)  | 0.744(0.214,1.273) | 1.310(0.764,1.855) | 0.0881  | 0.0384  |
